# Supplementary material for: Functional Analysis of Sporophytic Transcripts Repressed by the Female Gametophyte in the Ovule of Arabidopsis thaliana
Source: PubMed Central journal article supplement (PMC3806734; doi:10.1371/journal.pone.0076977), 2013-10-23
Supplement: pone.0076977.s001.pdf [file pone.0076977.s001.pdf]

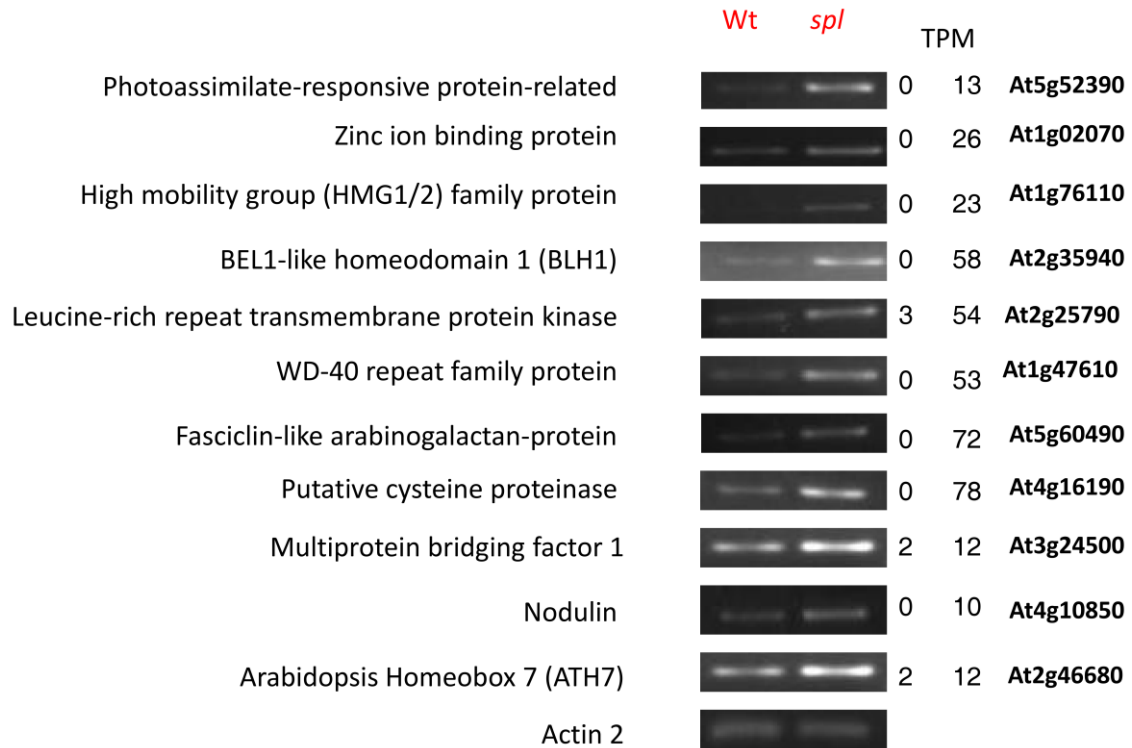

**Figure S1. RT-PCR analysis in wild type and *spl* ovules.**
