# Supplementary material for: Functional Analysis of Sporophytic Transcripts Repressed by the Female Gametophyte in the Ovule of Arabidopsis thaliana
Source: PubMed Central journal article supplement (PMC3806734; doi:10.1371/journal.pone.0076977), 2013-10-23
Supplement: pone.0076977.s010.pdf [file pone.0076977.s010.pdf]

**Table S6.** Primers used to analyze expression of candidate genes in *spl* and wild-type ovules.

| <b>Gene</b>      | <b>Primer</b> | <b>Sequence</b>       | <b>L</b> |
|------------------|---------------|-----------------------|----------|
| <b>At2g25790</b> | F-At2g25790   | ACGGAAGTTTGGTCAAGTGG  | 20       |
|                  | R-At2g25790   | ATGGCCGTACATTTCAAAGC  | 20       |
| <b>At3g24500</b> | F-At3g24500   | TTCGCGTTGTTCCTTTCTCT  | 20       |
|                  | R-At3g24500   | CCGGCATCGAATTTCTTAAC  | 20       |
| <b>At2g35940</b> | F-At2g35940   | GGATTTTCAGCTCCAACGAGA | 20       |
|                  | R-At2g35940   | GGTCTGCATGAAACCCTGAT  | 20       |
| <b>At1g47610</b> | F-At1g47610   | GTGCGGCGGATAAGAAGATA  | 20       |
|                  | R-At1g47610   | ACCACCGCCAAACACTTAAC  | 20       |
| <b>At4g10850</b> | F-At4g10850   | TTGGTTTGGGTTCTTTACGG  | 20       |
|                  | R-At4g10850   | CGTTGAAAACGCAACATACG  | 20       |
| <b>At5g52390</b> | F-At5g52390   | GACGATGTGAAGTGCGAGAA  | 20       |
|                  | R-At5g52390   | CAACAATGCGTCCGAAGATA  | 20       |
| <b>At1g02070</b> | F-At1g02070   | GCTAGACATGGCGGTTCTTC  | 20       |
|                  | R-At1g02070   | CCGTCTTAGGCGACGTA ACT | 20       |
| <b>At2g46680</b> | F-At2g46680   | GACCGGAGATGGAGATGAAA  | 20       |
|                  | R-At2g46680   | CTTCCTCAAACCCACCAAAA  | 20       |
| <b>At4g16190</b> | F-At4g16190   | GCCGCAAGTTTTTTAGGACTG | 20       |
|                  | R-At4g16190   | AATGACCAGCATGAACCACA  | 20       |
| <b>At5g60490</b> | F-At5g60490   | TCGTTAACCGATGAGCAACA  | 20       |
|                  | R-At5g60490   | GTTACGCCGGACGTGATATT  | 20       |
| <b>At1g76110</b> | F-At1g76110   | AATCCCTCAACGAGCAAAGA  | 20       |
|                  | R-At1g76110   | TGGGCCGAATGATAAAGAAC  | 20       |
